# Supplementary material for: The Role of Resilience and Basic Hope in the Adherence to Dietary Recommendations in the Polish Population during the COVID-19 Pandemic
Source: MDPI journal article supplement (doi:10.3390/nu13062108), 2021-06-19
Supplement: s1 [file s1]

### Food frequency consumption

How often do you consume these types of foods.

While answering to the questions, please consider foods eaten currently during your meal times, between the meals as well as those eaten at home and when you are out.

In this part please give only one answer to each question.

|    |                                 | Frequency               |               |                          |                |                         |       |
|----|---------------------------------|-------------------------|---------------|--------------------------|----------------|-------------------------|-------|
|    |                                 | a few<br>times a<br>day | once a<br>day | a few<br>times a<br>week | once a<br>week | 1-3<br>times a<br>month | Never |
| 1  | Vegetables                      |                         |               |                          |                |                         |       |
| 2  | Fruits                          |                         |               |                          |                |                         |       |
| 3  | Refined grains                  |                         |               |                          |                |                         |       |
| 4  | Whole grains                    |                         |               |                          |                |                         |       |
| 5  | Dairy products (no added sugar) |                         |               |                          |                |                         |       |
| 6  | Processed cheese                |                         |               |                          |                |                         |       |
| 7  | White meat                      |                         |               |                          |                |                         |       |
| 8  | Red and processed meat          |                         |               |                          |                |                         |       |
| 9  | Fish                            |                         |               |                          |                |                         |       |
| 10 | Legumes                         |                         |               |                          |                |                         |       |
| 11 | Butter/lard                     |                         |               |                          |                |                         |       |
| 12 | Oils/margarines                 |                         |               |                          |                |                         |       |
| 13 | Unsalted nuts, seeds            |                         |               |                          |                |                         |       |
| 14 | Salty snacks                    |                         |               |                          |                |                         |       |
| 15 | Sweets                          |                         |               |                          |                |                         |       |
| 16 | Fast food                       |                         |               |                          |                |                         |       |
| 17 | Sweetened drinks                |                         |               |                          |                |                         |       |
| 18 | Water                           |                         |               |                          |                |                         |       |

1. Gender: male/female
2. Age (years) .....
3. Education
  - a) Primary/vocational
  - b) Secondary
  - c) Tertiary
4. Place of residence
  - a) Countryside
  - b) Small town
  - c) Town
  - d) Big city

MEDGLISH

Katarzyna Kurczak

ul. Warszawska 3/20

05-100 Nowy Dwór Mazowiecki

NIP 531-145-91-63, Reg. 016450943

tel. 530 957 497

e-mail: medGLISH.kk@gmail.com

Nowy Dwór Mazowiecki, June 7th, 2021

WARSZAWSKI UNIWERSYTET MEDYCZNY

ul. Żwirki i Wigury 61

02-091 Warszawa

To Whom it May Concern,

it is hereby confirmed that the article entitled **'The role of resilience and basic hope in the adherence to dietary recommendations in the Polish population during the Covid-19 pandemic'** has been linguistically verified by Katarzyna Kurczak, MA, PhD, who is a Polish-English translator specializing in written medical translation. Copies of documents confirming the qualifications in translation are available upon request.

A handwritten signature in blue ink, reading "Katarzyna Kurczak". The signature is written in a cursive style. The text is placed on a light blue rectangular background.
